# Supplementary material for: Polymer-controlled core–shell nanoparticles: a novel strategy for sequential drug release
Source: Royal Society of Chemistry journal article supplement (doi:10.1039/c4ra03610g), 2014-01-01
Supplement: c4ra03610g1.pdf [file c4ra03610g1.pdf]

## Supplementary Material

Table S1 Size distribution and surface charge of nanoparticles

|                     | PVP/PLGA    | PVP-DOX/PLGA-CA4 | PCL/PLGA   | PCL-DOX/PLGA-CA4 |
|---------------------|-------------|------------------|------------|------------------|
| Particle Size (nm)  | 394.7±35.2  | 424.4±78.9       | 606.5±39.9 | 455.7±103.3      |
| Zeta Potential (mV) | +0.195±0.02 | -1.43±0.32       | +5.84±1.36 | -0.419±0.27      |

Table S2 Encapsulation efficiencies and drug loading rates of CA4 and DOX in nanoparticles

|                                | PCL-DOX/PLGA-CA4 |          | PVP-DOX/PLGA-CA4 |          |
|--------------------------------|------------------|----------|------------------|----------|
|                                | CA4              | DOX      | CA4              | DOX      |
| Encapsulation Efficiencies (%) | 94.3±7.2         | 90.2±4.8 | 89.7±8.8         | 91.4±5.6 |

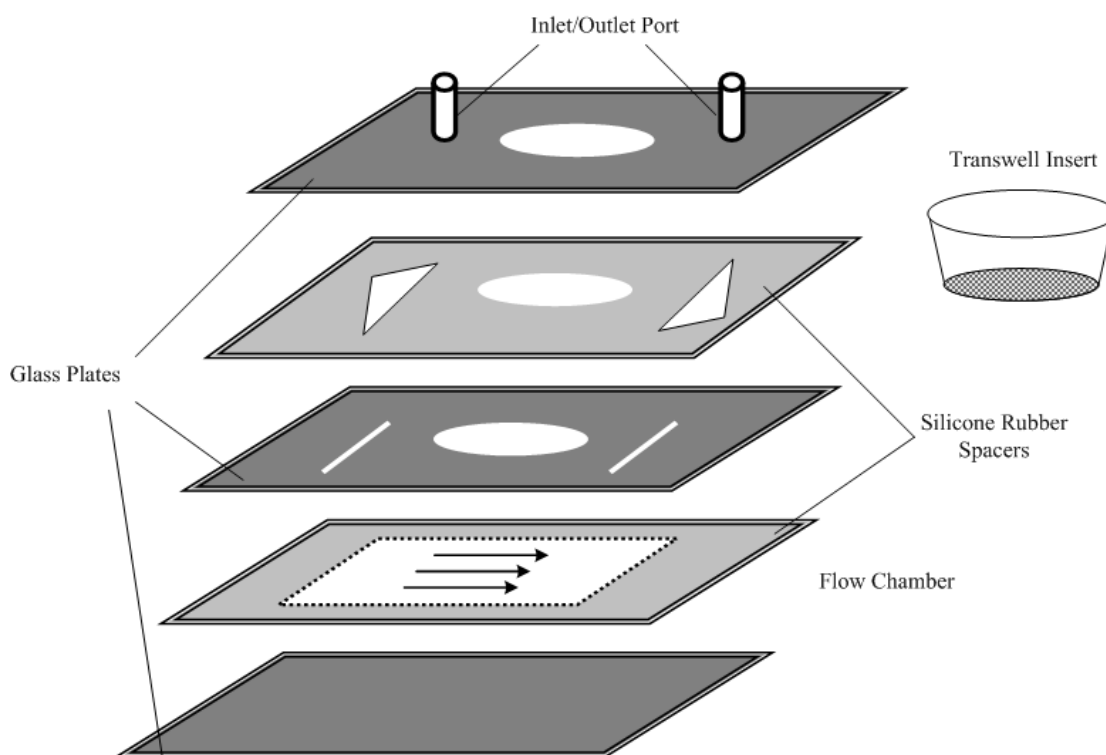

Fig.S1 Schematic of the co-culture parallel-plate flow chamber

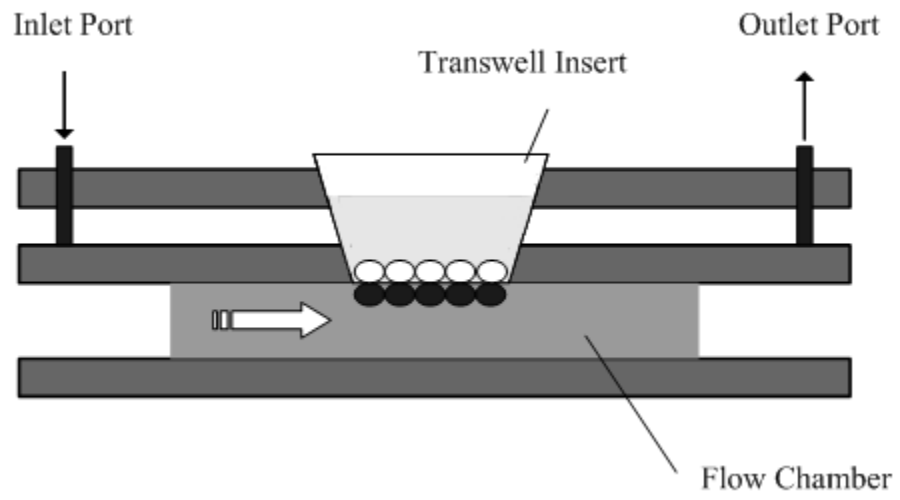

Fig.S2 Schematic of the co-culture parallel-plate flow chamber (side view)
